# Supplementary material
Source: PubMed Central journal article supplement (PMC3237854)
Supplement: NIHMS339905-supplement-1_si_002.pdf [file NIHMS339905-supplement-1_si_002.pdf]

# Supporting Information

## Use of Top-down and Bottom-up Fourier Transform Ion Cyclotron Resonance Mass Spectrometry for Mapping Calmodulin Sites modified by Platinum Anticancer Drugs

Huilin Li,<sup>†</sup> Tzu-Yung Lin,<sup>‡</sup> Steve L. Van Orden,<sup>§</sup> Yao Zhao,<sup>†</sup> Mark P. Barrow,<sup>†</sup> Ana M. Pizarro,<sup>†</sup>  
Yulin Qi,<sup>†</sup> Peter J. Sadler,<sup>†</sup> Peter B. O'Connor,<sup>†\*</sup>

<sup>†</sup>Department of Chemistry, University of Warwick, Coventry, CV4 7AL, United Kingdom

<sup>‡</sup>School of Engineering, University of Warwick, Coventry, CV4 7AL, United Kingdom

<sup>§</sup>Bruker Daltonics, 40 Manning Road, Billerica, MA, 01821, USA

Table S-1. Peak list for Figure 1b'.

| Assignments                                                     | Exp. mass<br>(Da) | Theo. mass<br>(Da) | Error<br>(ppm) |
|-----------------------------------------------------------------|-------------------|--------------------|----------------|
| $[\text{CaM}+\text{Pt}_6(\text{NH}_3)_4+\text{H}]^{13+}$        | 1386.677006       | 1386.673225        | 2.73           |
| $[\text{CaM}+\text{Pt}_7(\text{NH}_3)_6-\text{H}]^{13+}$        | 1404.131852       | 1404.134884        | -2.16          |
| $[\text{CaM}+\text{Pt}_8(\text{NH}_3)_8-3\text{H}]^{13+}$       | 1421.673874       | 1421.673598        | 0.19           |
| $[\text{CaM}+\text{Pt}_9(\text{NH}_3)_{10}-5\text{H}]^{13+}$    | 1439.059673       | 1439.058202        | 1.02           |
| $[\text{CaM}+\text{Pt}^{10}(\text{NH}_3)_{12}-7\text{H}]^{13+}$ | 1456.595243       | 1456.596912        | -1.15          |
| Mean absolute deviation (ppm)                                   |                   |                    | 1.45           |

Table S-2. ECD Fragments of the [CaM+2Pt+12H]<sup>16+</sup> ions

| No. | Assignments                     | Exp. mass<br>(Da) | Theo. mass<br>(Da) | Error<br>(ppm) |
|-----|---------------------------------|-------------------|--------------------|----------------|
| 1   | c <sub>4</sub>                  | 487.251185        | 487.251089         | 0.20           |
| 2   | c <sub>5</sub> -NH <sub>3</sub> | 571.272554        | 571.272066         | 0.85           |
| 3   | c <sub>5</sub>                  | 588.299110        | 588.298615         | 0.84           |
| 4   | c <sub>6</sub>                  | 717.341071        | 717.341228         | -0.22          |
| 5   | c <sub>13</sub> <sup>2+</sup>   | 781.888567        | 781.888477         | 0.12           |
| 6   | c <sub>21</sub> <sup>3+</sup>   | 834.413684        | 834.414059         | -0.45          |
| 7   | c <sub>7</sub>                  | 846.384520        | 846.383953         | 0.67           |
| 8   | c <sub>14</sub>                 | 846.910394        | 846.911461         | -1.26          |
| 9   | c <sub>23</sub> <sup>3+</sup>   | 891.429248        | 891.429057         | 0.21           |
| 10  | c <sub>49</sub> <sup>6+</sup>   | 908.450501        | 908.449960         | 0.60           |
| 11  | c <sub>41</sub> <sup>5+</sup>   | 913.256014        | 913.256163         | -0.16          |
| 12  | c <sub>33</sub> <sup>4+</sup>   | 923.205572        | 923.204933         | 0.69           |
| 13  | c <sub>24</sub> <sup>4+</sup>   | 930.106823        | 930.105842         | 1.05           |
| 14  | ? <sup>2+</sup>                 | 933.959746        |                    |                |
| 15  | c <sub>25</sub> <sup>3+</sup>   | 949.112602        | 949.112996         | -0.42          |
| 16  | c <sub>16</sub> <sup>2+</sup>   | 955.463113        | 955.462538         | 0.60           |
| 17  | ? <sup>3+</sup>                 | 961.785910        |                    |                |
| 18  | c <sub>94</sub> <sup>11+</sup>  | 972.469758        | 972.468904         | 0.88           |
| 19  | c <sub>79</sub> <sup>9+</sup>   | 982.249595        | 982.250077         | -0.49          |
| 20  | c <sub>26</sub> <sup>3+</sup>   | 982.796265        | 982.795556         | 0.72           |
| 21  | c <sub>53</sub> <sup>6+</sup>   | 987.315973        | 987.315676         | 0.30           |
| 22  | c <sub>96</sub> <sup>11+</sup>  | 988.202801        | 988.200869         | 1.96           |
| 23  | c <sub>80</sub> <sup>9+</sup>   | 995.366295        | 995.365239         | 1.06           |
| 24  | c <sub>97</sub> <sup>11+</sup>  | 998.384463        | 998.386015         | -1.55          |
| 25  | c <sub>17</sub> <sup>2+</sup>   | 998.978543        | 998.978552         | -0.01          |
| 26  | c <sup>45 5+</sup>              | 1001.493617       | 1001.493358        | 0.26           |
| 27  | ? <sup>5+</sup>                 | 1006.899099       |                    |                |
| 28  | c <sub>46</sub> <sup>5+</sup>   | 1015.700577       | 1015.700781        | -0.20          |
| 29  | c <sub>82</sub> <sup>9+</sup>   | 1019.261988       | 1019.262073        | -0.08          |
| 30  | c <sub>27</sub> <sup>3+</sup>   | 1020.491172       | 1020.490244        | 0.91           |
| 31  | c <sub>90</sub> <sup>10+</sup>  | 1020.589788       | 1020.588878        | 0.89           |
| 32  | c <sub>100</sub> <sup>11+</sup> | 1028.858151       | 1028.856488        | 1.62           |
| 33  | c <sub>91</sub> <sup>10+</sup>  | 1030.495724       | 1030.495721        | 0.00           |
| 34  | ? <sup>3+</sup>                 | 1033.498990       |                    |                |
| 35  | c <sub>101</sub> <sup>11+</sup> | 1036.676848       | 1036.677290        | -0.43          |
| 36  | c <sub>102</sub> <sup>11+</sup> | 1043.044905       | 1043.044017        | 0.85           |
| 37  | c <sub>37</sub> <sup>4+</sup>   | 1045.019694       | 1045.019357        | 0.32           |
| 38  | c <sub>92</sub> <sup>10+</sup>  | 1045.201623       | 1045.202563        | -0.90          |
| 39  | c <sub>103</sub> <sup>11+</sup> | 1049.500306       | 1049.501937        | -1.55          |
| 40  | c <sub>28</sub> <sup>3+</sup>   | 1054.173714       | 1054.172804        | 0.86           |
| 41  | c <sub>67</sub> <sup>7+</sup>   | 1055.074252       | 1055.073554        | 0.66           |
| 42  | c <sub>93</sub> <sup>10+</sup>  | 1056.706278       | 1056.705258        | 0.97           |
| 43  | c <sub>76</sub> <sup>8+</sup>   | 1062.133808       | 1062.135027        | -1.15          |

|    |                                                                 |             |             |       |
|----|-----------------------------------------------------------------|-------------|-------------|-------|
| 44 | c <sub>48</sub> <sup>5+</sup>                                   | 1064.127351 | 1064.126113 | 1.16  |
| 45 | c <sub>38</sub> <sup>4+</sup>                                   | 1066.776957 | 1066.777364 | -0.38 |
| 46 | ? <sup>3+</sup>                                                 | 1067.181663 |             |       |
| 47 | c <sub>94</sub> <sup>10+</sup>                                  | 1069.514904 | 1069.514755 | 0.14  |
| 48 | [CaM+2Pt-H <sub>2</sub> O+12H] <sup>16+</sup>                   | 1073.368652 | 1073.367424 | 1.14  |
| 49 | [CaM+2Pt+12H] <sup>16+</sup>                                    | 1074.494353 | 1074.493084 | 1.18  |
| 50 | [CaM+2Pt(NH <sub>3</sub> )+12H] <sup>16+</sup>                  | 1075.558402 | 1075.557242 | 1.08  |
| 51 | [CaM+2Pt(NH <sub>3</sub> ) <sub>2</sub> +12H] <sup>16+</sup>    | 1076.620720 | 1076.621401 | -0.63 |
| 52 | c <sub>86</sub> <sup>9+</sup>                                   | 1077.847853 | 1077.847672 | 0.17  |
| 53 | c <sub>95</sub> <sup>10+</sup>                                  | 1081.019396 | 1081.017449 | 1.80  |
| 54 | c <sub>59</sub> <sup>6+</sup>                                   | 1085.018357 | 1085.019890 | -1.41 |
| 55 | c <sub>96</sub> <sup>10+</sup>                                  | 1086.719723 | 1086.719596 | 0.12  |
| 56 | c <sub>29</sub> <sup>3+</sup>                                   | 1087.856033 | 1087.855363 | 0.62  |
| 57 | c <sub>49</sub> <sup>5+</sup>                                   | 1089.938816 | 1089.938497 | 0.29  |
| 58 | c <sub>87</sub> <sup>9+</sup>                                   | 1092.186173 | 1092.185738 | 0.40  |
| 59 | c <sub>78</sub> <sup>8+</sup>                                   | 1092.650223 | 1092.650656 | -0.40 |
| 60 | c <sub>39</sub> <sup>4+</sup>                                   | 1095.048661 | 1095.048374 | 0.26  |
| 61 | ? <sup>8+</sup>                                                 | 1097.152540 |             |       |
| 62 | c <sub>97</sub> <sup>10+</sup>                                  | 1098.225201 | 1098.224200 | 0.91  |
| 63 | c <sub>88</sub> <sup>9+</sup>                                   | 1100.078004 | 1100.078751 | -0.68 |
| 64 | c <sub>60</sub> <sup>6+</sup>                                   | 1104.027280 | 1104.026745 | 0.48  |
| 65 | c <sub>79</sub> <sup>8+</sup>                                   | 1105.156919 | 1105.156227 | 0.63  |
| 66 | c <sub>70</sub> <sup>7+</sup>                                   | 1106.673577 | 1106.673581 | 0.00  |
| 67 | c <sub>40</sub> <sup>4+</sup>                                   | 1108.802640 | 1108.802070 | 0.51  |
| 68 | c <sub>50</sub> <sup>5+</sup>                                   | 1112.943886 | 1112.944782 | -0.81 |
| 69 | ? <sup>8+</sup>                                                 | 1113.906926 |             |       |
| 70 | ? <sup>3+</sup>                                                 | 1115.883442 |             |       |
| 71 | c <sub>89</sub> <sup>9+</sup>                                   | 1116.531223 | 1116.531154 | 0.06  |
| 72 | c <sub>80</sub> <sup>8+</sup>                                   | 1119.534174 | 1119.534595 | -0.38 |
| 73 | z <sub>74</sub> +2Pt <sup>8+</sup>                              | 1119.747419 | 1119.748572 | -1.03 |
| 74 | b <sub>19</sub> <sup>2+</sup>                                   | 1121.042682 | 1121.043222 | -0.48 |
| 75 | ? <sup>8+</sup>                                                 | 1122.533770 |             |       |
| 76 | z <sub>65</sub> +2Pt-H <sub>2</sub> O <sup>7+</sup>             | 1124.785837 | 1124.784931 | 0.81  |
| 77 | z <sub>65</sub> +2Pt <sup>7+</sup>                              | 1127.072093 | 1127.071608 | 0.43  |
| 78 | c <sub>19</sub> <sup>2+</sup>                                   | 1129.556824 | 1129.556496 | 0.29  |
| 79 | c <sub>81</sub> <sup>8+</sup>                                   | 1130.413850 | 1130.413598 | 0.22  |
| 80 | c <sub>30</sub> <sup>3+</sup>                                   | 1130.554111 | 1130.553684 | 0.38  |
| 81 | ? <sup>10+</sup>                                                | 1135.541130 |             |       |
| 82 | c <sup>41</sup> 4+                                              | 1140.817080 | 1140.816715 | 0.32  |
| 83 | [CaM+2Pt+12H-H <sub>2</sub> O-CH <sub>3</sub> S] <sup>15+</sup> | 1141.791667 | 1141.792273 | -0.53 |
| 84 | [CaM+2Pt+12H-CH <sub>3</sub> S] <sup>15+</sup>                  |             |             |       |
| 85 | [CaM+2Pt+12H-H <sub>2</sub> O] <sup>15+</sup>                   | 1144.926094 | 1144.925288 | 0.70  |
| 86 | [CaM+2Pt+12H] <sup>15+</sup>                                    | 1146.126927 | 1146.125993 | 0.81  |
| 87 | z <sub>107</sub> +2Pt <sup>11+</sup>                            | 1147.780157 | 1147.783193 | -2.65 |
| 88 | ? <sup>9+</sup>                                                 | 1156.222090 |             |       |
| 89 | c <sub>92</sub> <sup>9+</sup>                                   | 1161.223933 | 1161.224262 | -0.28 |
| 90 | c <sub>52</sub> <sup>5+</sup>                                   | 1161.763879 | 1161.768796 | -4.23 |

|     |                                                     |             |             |       |
|-----|-----------------------------------------------------|-------------|-------------|-------|
| 91  | c <sub>83</sub> <sup>8+</sup>                       | 1162.675131 | 1162.674247 | 0.76  |
| 92  | z <sub>67</sub> +2Pt <sup>7+</sup>                  | 1163.940663 | 1163.940926 | -0.23 |
| 93  | ? <sup>7+</sup>                                     | 1165.942120 |             |       |
| 94  | c <sub>31</sub> <sup>3+</sup>                       | 1173.234130 | 1173.233411 | 0.61  |
| 95  | c <sub>93</sub> <sup>9+</sup>                       | 1174.004376 | 1174.005033 | -0.56 |
| 96  | ? <sup>5+</sup>                                     | 1175.574590 |             |       |
| 97  | z <sub>68</sub> +2Pt <sup>7+</sup>                  | 1176.372827 | 1176.373992 | -0.99 |
| 98  | c <sub>74</sub> <sup>7+</sup>                       | 1176.419026 | 1176.420805 | -1.51 |
| 99  | z <sub>121</sub> +2Pt <sup>12+</sup>                | 1177.537619 | 1177.537189 | 0.37  |
| 100 | ? <sup>7+</sup>                                     | 1178.377140 |             |       |
| 101 | ? <sup>8+</sup>                                     | 1180.399070 |             |       |
| 102 | ? <sup>9+</sup>                                     | 1183.016110 |             |       |
| 103 | c <sub>53</sub> <sup>5+</sup>                       | 1184.577415 | 1184.577356 | 0.05  |
| 104 | c <sub>20</sub> <sup>2+</sup>                       | 1187.071101 | 1187.069968 | 0.95  |
| 105 | c <sub>94</sub> <sup>9+</sup>                       | 1188.238722 | 1188.237808 | 0.77  |
| 106 | z <sub>59</sub> +2Pt <sup>6+</sup>                  | 1190.352377 | 1190.352448 | -0.06 |
| 107 | z <sub>69</sub> +2Pt-H <sub>2</sub> O <sup>7+</sup> | 1190.377452 | 1190.376543 | 0.76  |
| 108 | z <sub>69</sub> +2Pt <sup>7+</sup>                  | 1192.804719 | 1192.806414 | -1.42 |
| 109 | c <sub>85</sub> <sup>8+</sup>                       | 1192.938986 | 1192.940081 | -0.92 |
| 110 | c <sub>43</sub> <sup>4+</sup>                       | 1194.093265 | 1194.092309 | 0.80  |
| 111 | c <sub>75</sub> <sup>7+</sup>                       | 1195.147411 | 1195.145872 | 1.29  |
| 112 | ? <sup>7+</sup>                                     | 1194.808800 |             |       |
| 113 | ? <sup>9+</sup>                                     | 1202.240420 |             |       |
| 114 | z <sub>91</sub> +2Pt <sup>9+</sup>                  | 1205.870621 | 1205.869506 | 0.92  |
| 115 | z <sub>70</sub> +2Pt <sup>7+</sup>                  | 1207.242180 | 1207.241798 | 0.32  |
| 116 | c <sub>96</sub> <sup>9+</sup>                       | 1207.353931 | 1207.354298 | -0.30 |
| 117 | c <sub>32</sub> <sup>3+</sup>                       | 1211.262424 | 1211.262570 | -0.12 |
| 118 | c <sub>86</sub> <sup>8+</sup>                       | 1212.453502 | 1212.452721 | 0.64  |
| 119 | c <sub>76</sub> <sup>7+</sup>                       | 1213.725382 | 1213.724705 | 0.56  |
| 120 | z <sub>60</sub> +2Pt <sup>6+</sup>                  | 1215.032755 | 1215.031015 | 1.43  |
| 121 | c <sub>44</sub> <sup>4+</sup>                       | 1219.355010 | 1219.354229 | 0.64  |
| 122 | [CaM+2Pt+12H-CH <sub>3</sub> S] <sup>14+</sup>      | 1224.634869 | 1224.635372 | -0.41 |
| 123 | [CaM+2Pt+12H-CO] <sup>14+</sup>                     | 1225.992780 | 1225.992537 | 0.20  |
| 124 | [CaM+2Pt+12H-H <sub>2</sub> O] <sup>14+</sup>       | 1226.706234 | 1226.705705 | 0.43  |
| 125 | [CaM+2Pt+12H] <sup>14+</sup>                        | 1227.992732 | 1227.992174 | 0.45  |
| 126 | c <sub>33</sub> <sup>3+</sup>                       | 1229.935720 | 1229.935254 | 0.38  |
| 127 | c <sub>67</sub> <sup>6+</sup>                       | 1230.751932 | 1230.751267 | 0.54  |
| 128 | c <sub>77</sub> <sup>7+</sup>                       | 1232.023615 | 1232.023988 | -0.30 |
| 129 | c <sub>88</sub> <sup>8+</sup>                       | 1237.461981 | 1237.462685 | -0.57 |
| 130 | ? <sup>7+</sup>                                     | 1242.000000 |             |       |
| 131 | z <sub>72</sub> +2Pt <sup>7+</sup>                  | 1242.687540 | 1242.691819 | -3.44 |
| 132 | ? <sup>6+</sup>                                     | 1242.943100 |             |       |
| 133 | ? <sup>3+</sup>                                     | 1243.000000 |             |       |
| 134 | ? <sup>5+</sup>                                     | 1244.201300 |             |       |
| 135 | z <sub>62</sub> +2Pt <sup>6+</sup>                  | 1248.375161 | 1248.377637 | -1.98 |
| 136 | c <sub>78</sub> <sup>7+</sup>                       | 1248.456738 | 1248.456408 | 0.26  |
| 137 | ? <sup>3+</sup>                                     | 1249.610000 |             |       |

|     |                         |             |             |       |
|-----|-------------------------|-------------|-------------|-------|
| 138 | $\gamma^{8+}$           | 1250.000000 |             |       |
| 139 | $c_{21}^{2+}$           | 1250.615870 | 1250.615744 | 0.10  |
| 140 | $\gamma^{2+}$           | 1251.364150 |             |       |
| 141 | $c_{45}^{4+}$           | 1251.865868 | 1251.865714 | 0.12  |
| 142 | $z_{95}+2Pt^{9+}$       | 1251.888717 | 1251.888961 |       |
| 143 | $c_{56}^{5+}$           | 1253.204806 | 1253.204948 | -0.11 |
| 144 | $\gamma^{7+}$           | 1253.888000 |             |       |
| 145 | $c_{89}^{8+}$           | 1255.971803 | 1255.971638 | 0.13  |
| 146 | $\gamma^{7+}$           | 1256.000000 |             |       |
| 147 | $\gamma^{4+}$           | 1258.371706 |             |       |
| 148 | $\gamma^{10+}$          | 1260.359460 |             |       |
| 149 | $z_{107}+2Pt-H_2O^{5+}$ | 1260.656613 | 1260.659728 | -2.47 |
| 150 | $z_{73}+2Pt^{7+}$       | 1260.837659 | 1260.836639 | 0.81  |
| 151 | $z_{107}+2Pt^{5+}$      | 1262.561551 | 1262.561119 | 0.34  |
| 152 | $c_{79}^{7+}$           | 1262.892100 | 1262.891791 | 0.24  |
| 153 | $c_{34}^{3+}$           | 1263.618710 | 1263.617813 | 0.71  |
| 154 | $z_{52}+2Pt^{5+}$       | 1264.739565 | 1264.739841 | -0.22 |
| 155 | $z_{131}+2Pt^{12+}$     | 1265.994248 | 1265.993547 | 0.55  |
| 156 | $\gamma^{11+}$          | 1265.000000 |             |       |
| 157 | $\gamma^{12+}$          | 1266.000000 |             |       |
| 158 | $c_{57}^{5+}$           | 1267.412701 | 1267.412372 | 0.26  |
| 159 | $\gamma^{5+}$           | 1268.000000 |             |       |
| 160 | $c_{46}^{4+}$           | 1268.873590 | 1268.872484 | 0.87  |
| 161 | $\gamma^{7+}$           | 1272.606500 |             |       |
| 162 | $z_{132}+2Pt^{12+}$     | 1273.246333 | 1273.246219 | 0.09  |
| 163 | $\gamma^{12+}$          | 1274.000000 |             |       |
| 164 | $z_{53}+2Pt-H_2O^{5+}$  | 1272.942707 | 1272.942630 | 0.06  |
| 165 | $\gamma^{9+}$           | 1274.495550 |             |       |
| 166 | $z_{53}+2Pt^{5+}$       | 1275.944404 | 1275.943558 | 0.66  |
| 167 | $z_{74}+2Pt^{7+}$       | 1279.710457 | 1279.711822 | -1.07 |
| 168 | $c_{80}^{7+}$           | 1279.323742 | 1279.324212 | -0.37 |
| 169 | $\gamma^{8+}$           | 1280.000000 |             |       |
| 170 | $\gamma^{7+}$           | 1282.491800 |             |       |
| 171 | $c_{58}^{5+}$           | 1290.418417 | 1290.417760 | 0.51  |
| 172 | $c_{70}^{6+}$           | 1290.951358 | 1290.951298 | 0.05  |
| 173 | $c_{81}^{7+}$           | 1291.756077 | 1291.757359 | -0.99 |
| 174 | $z_{64}+2Pt^{6+}$       | 1293.408162 | 1293.408711 | -0.42 |
| 175 | $z_{122}+2Pt^{11+}$     | 1294.864144 | 1294.865979 | -1.42 |
| 176 | $\gamma^{5+}$           | 1295.000000 |             |       |
| 177 | $c_{35}^{3+}$           | 1297.309026 | 1297.309517 | -0.38 |
| 178 | $z_{54}+2Pt^{5+}$       | 1299.148906 | 1299.149528 | -0.48 |
| 179 | $\gamma^{5+}$           | 1301.000000 |             |       |
| 180 | $c_{47}^{4+}$           | 1301.885028 | 1301.885641 | -0.47 |
| 181 | $c_{59}^{5+}$           | 1301.420330 | 1301.420750 | -0.32 |
| 182 | $\gamma^{7+}$           | 1303.474260 |             |       |
| 183 | $c_{92}^{8+}$           | 1306.251575 | 1306.251385 | 0.15  |
| 184 | $c_{22}^{2+}$           | 1308.631393 | 1308.630910 | 0.37  |

|     |                                                     |             |             |       |
|-----|-----------------------------------------------------|-------------|-------------|-------|
| 185 | c <sub>82</sub> <sup>7+</sup>                       | 1310.191838 | 1310.192015 | -0.14 |
| 186 | z <sub>76</sub> +2Pt <sup>7+</sup>                  | 1311.441480 |             |       |
| 187 | z <sub>65</sub> +2Pt <sup>6+</sup>                  | 1314.748303 | 1314.748996 | -0.53 |
| 188 | [CaM+2Pt+12H-CH <sub>3</sub> S] <sup>13+...</sup>   | 1318.836070 | 1318.838135 | -1.57 |
| 189 | [CaM+2Pt+12H-H <sub>2</sub> O] <sup>13+...</sup>    | 1321.067250 | 1321.067725 | -0.36 |
| 190 | [CaM+2Pt+12H] <sup>13+...</sup>                     | 1322.453906 | 1322.453153 | 0.57  |
| 191 | c <sub>60</sub> <sup>5+</sup>                       | 1324.630509 | 1324.630639 | -0.10 |
| 192 | z <sub>55</sub> +2Pt <sup>5+</sup>                  | 1324.770001 | 1324.768528 | 1.11  |
| 193 | ? <sup>5+</sup>                                     | 1328.000000 |             |       |
| 194 | c <sub>83</sub> <sup>7+</sup>                       | 1328.626544 | 1328.626667 | -0.09 |
| 195 | z <sub>77</sub> +2Pt <sup>7+</sup>                  | 1330.304938 | 1330.304636 | 0.23  |
| 196 | z <sub>66</sub> +2Pt-H <sub>2</sub> O <sup>6+</sup> | 1333.422287 | 1333.421153 | 0.85  |
| 197 | c <sub>72</sub> <sup>6+</sup>                       | 1334.631125 | 1334.631462 | -0.25 |
| 198 | c <sub>61</sub> <sup>5+</sup>                       | 1336.034546 | 1336.034932 | -0.29 |
| 199 | z <sub>66</sub> +2Pt <sup>6+</sup>                  | 1336.088729 | 1336.088891 | -0.12 |
| 200 | c <sub>94</sub> <sup>8+</sup>                       | 1336.640563 | 1336.641625 | -0.79 |
| 201 | c <sub>23</sub> <sup>2+</sup>                       | 1337.142104 | 1337.141653 | 0.34  |
| 202 | ? <sup>6+</sup>                                     | 1338.759470 |             |       |
| 203 | c <sub>36</sub> <sup>3+</sup>                       | 1340.321720 | 1340.320779 | 0.70  |
| 204 | z <sub>90</sub> +2Pt <sup>8+</sup>                  | 1342.349572 | 1342.349504 | 0.05  |
| 205 | ? <sup>9+</sup>                                     | 1345.376740 |             |       |
| 206 | z <sub>56</sub> +2Pt <sup>5+</sup>                  | 1347.774205 | 1347.773920 | 0.21  |
| 207 | ? <sup>7+</sup>                                     | 1348.884500 |             |       |
| 208 | ? <sup>10+</sup>                                    | 1349.706570 |             |       |
| 209 | z <sub>43</sub> +2Pt <sup>4+</sup>                  | 1351.311122 | 1351.311961 | -0.62 |
| 210 | ? <sup>8+</sup>                                     | 1352.773000 |             |       |
| 211 | z <sub>102</sub> +2Pt <sup>9+</sup>                 | 1353.712654 | 1353.713556 | -0.67 |
| 212 | z <sub>91</sub> +2Pt <sup>8+</sup>                  | 1356.477797 | 1356.477285 | 0.38  |
| 213 | z <sub>67</sub> +2Pt <sup>6+</sup>                  | 1357.931567 | 1357.930016 | 1.14  |
| 214 | ? <sup>6+</sup>                                     | 1360.099190 |             |       |
| 215 | c <sub>49</sub> <sup>4+</sup>                       | 1362.171530 | 1362.171302 | 0.17  |
| 216 | c <sub>85</sub> <sup>7+</sup>                       | 1363.214732 | 1363.216196 | -1.07 |
| 217 | z <sub>92</sub> +2Pt <sup>8+</sup>                  | 1365.357533 | 1365.356925 | 0.45  |
| 218 | c <sub>74</sub> <sup>6+</sup>                       | 1372.153591 | 1372.155863 | -1.66 |
| 219 | z <sub>68</sub> +2Pt <sup>6+</sup>                  | 1372.435848 | 1372.435355 | 0.36  |
| 220 | ? <sup>6+</sup>                                     | 1374.771600 |             |       |
| 221 | z <sub>57</sub> +2Pt <sup>5+</sup>                  | 1377.388759 | 1377.387797 | 0.70  |
| 222 | c <sub>63</sub> <sup>5+</sup>                       | 1378.861357 | 1378.861283 | 0.05  |
| 223 | z <sub>44</sub> +2Pt <sup>4+</sup>                  | 1379.334074 | 1379.333964 | 0.08  |
| 224 | z <sub>131</sub> +2Pt <sup>11+</sup>                | 1380.994694 | 1380.992299 | 1.73  |
| 225 | z <sub>69</sub> +2Pt-H <sub>2</sub> O <sup>6+</sup> | 1388.770549 | 1388.771907 | -0.98 |
| 226 | z <sub>132</sub> +2Pt <sup>11+</sup>                | 1388.996875 | 1388.995386 | 1.07  |
| 227 | z <sub>69</sub> +2Pt <sup>6+</sup>                  | 1391.440236 | 1391.439604 | 0.45  |
| 228 | c <sub>37</sub> <sup>3+</sup>                       | 1393.023301 | 1393.023384 | -0.06 |
| 229 | c <sub>75</sub> <sup>6+</sup>                       | 1394.171361 | 1394.168971 | 1.71  |
| 230 | c <sub>24</sub> <sup>2+</sup>                       | 1394.655297 | 1394.655124 | 0.12  |
| 231 | z <sub>58</sub> +2Pt <sup>5+</sup>                  | 1397.202516 | 1397.201483 | 0.74  |

|     |                         |             |             |       |
|-----|-------------------------|-------------|-------------|-------|
| 232 | $z_{107}+2Pt-H_2O^{9+}$ | 1400.732706 | 1400.732594 | 0.08  |
| 233 | $z_{81}+2Pt^{7+}$       | 1400.621241 | 1400.624647 | -2.43 |
| 234 | $c_{64}^{5+}$           | 1401.866275 | 1401.866672 | -0.28 |
| 235 | $z_{107}+2Pt^{9+}$      | 1402.736261 | 1402.733768 | 1.78  |
| 236 | $z_{120}+2Pt^{10+}$     | 1403.139980 | 1403.139043 | 0.67  |
| 237 | $?^{5+}$                | 1403.000000 |             |       |
| 238 | $z_{70}+2Pt^{6+}$       | 1408.280181 | 1408.280886 | -0.50 |
| 239 | $z_{95}+2Pt^{8+}$       | 1408.375197 | 1408.374366 | 0.59  |
| 240 | $z_{45}+2Pt^{4+}$       | 1411.593647 | 1411.593364 | 0.20  |
| 241 | $z_{121}+2Pt^{10+}$     | 1412.844525 | 1412.840680 | 2.72  |
| 242 | $c_{25}^{2+}$           | 1422.664410 | 1422.664151 | 0.18  |
| 243 | $z_{71}+2Pt^{6+}$       | 1427.617419 | 1427.618955 | -1.08 |
| 244 | $z_{59}+2Pt^{5+}$       | 1428.423507 | 1428.421708 | 1.26  |
| 245 | $z_{46}+2Pt^{4+}$       | 1429.354651 | 1429.353902 | 0.52  |
| 246 | $c_{89}^{7+}$           | 1435.110340 | 1435.108949 | 0.97  |
| 247 | $c_{77}^{6+}$           | 1437.362678 | 1437.360625 | 1.43  |
| 248 | $?^{2+}$                | 1442.176230 |             |       |
| 249 | $z_{47}+2Pt^{4+}$       | 1447.112014 | 1447.111927 | 0.06  |
| 250 | $z_{72}+2Pt^{6+}$       | 1449.135856 | 1449.135271 | 0.40  |
| 251 | $c_{52}^{4+}$           | 1451.959839 | 1451.959176 | 0.46  |
| 252 | $z_{60}+2Pt^{5+}$       | 1457.837282 | 1457.835763 | 1.04  |
| 253 | $c_{39}^{3+}$           | 1459.728326 | 1459.728739 | -0.28 |
| 254 | $z_{48}+2Pt^{4+}$       | 1468.871743 | 1468.869937 | 1.23  |
| 255 | $z_{73}+2Pt^{6+}$       | 1470.978176 | 1470.975354 | 1.92  |
| 256 | $z_{61}+2Pt^{5+}$       | 1472.045369 | 1472.043187 | 1.48  |
| 257 | $c_{26}^{2+}$           | 1473.188130 | 1473.187990 | 0.10  |
| 258 | $c_{40}^{3+}$           | 1478.734907 | 1478.735894 | -0.67 |
| 259 | $c_{53}^{4+}$           | 1479.969370 | 1479.968251 | 0.76  |
| 260 | $?^{6+}$                | 1484.872660 |             |       |
| 261 | $z_{74}+2Pt^{6+}$       | 1492.990490 | 1492.990454 | 0.02  |
| 262 | $?^{5+}$                | 1494.048690 |             |       |
| 263 | $z_{62}+2Pt^{5+}$       | 1497.851964 | 1497.851709 | 0.17  |
| 264 | $z_{49}+2Pt^{4+}$       | 1497.141856 | 1497.140959 | 0.60  |
| 265 | $?^{9+}$                | 1500.956880 |             |       |
| 266 | $?^{3+}$                | 1506.416720 |             |       |
| 267 | $?^{3+}$                | 1507.722080 |             |       |
| 268 | $?^{8+}$                | 1513.000000 |             |       |
| 269 | $?^{10+}$               | 1519.190850 |             |       |
| 270 | $c_{41}^{3+}$           | 1520.753210 | 1520.753194 | 0.01  |
| 271 | $?^{3+}$                | 1521.000000 |             |       |
| 272 | $z_{131}+2Pt^{6+}$      | 1519.191184 | 1519.191177 | 0.00  |
| 273 | $z_{89}+2Pt^{7+}$       | 1525.539479 | 1525.537512 | 1.29  |
| 274 | $c_{27}^{2+}$           | 1529.728950 | 1529.730022 | -0.70 |
| 275 | $?^{4+}$                | 1532.436430 |             |       |
| 276 | $z_{50}+2Pt^{4+}$       | 1537.908816 | 1537.906876 | 1.26  |
| 277 | $c_{55}^{4+}$           | 1537.497254 | 1537.497630 | -0.24 |
| 278 | $?^{6+}$                | 1542.393240 |             |       |



|     |                         |             |             |       |
|-----|-------------------------|-------------|-------------|-------|
| 279 | $\gamma^{11+}$          | 1546.254890 |             |       |
| 280 | $z_{51}+2Pt^{4+}$       | 1552.162874 | 1552.162244 | 0.41  |
| 281 | $c_{13}$                | 1562.769610 | 1562.769676 | -0.04 |
| 282 | $c_{56}^{4+}$           | 1566.254010 | 1566.254366 | -0.23 |
| 283 | $\gamma^{2+}$           | 1571.000000 |             |       |
| 284 | $\gamma^{4+}$           | 1570.000000 |             |       |
| 285 | $\gamma^{8+}$           | 1572.698870 |             |       |
| 286 | $\gamma^{2+}$           | 1573.000000 |             |       |
| 287 | $\gamma^{4+}$           | 1575.000000 |             |       |
| 288 | $z_{107}+2Pt-H_2O^{8+}$ | 1575.575603 | 1575.572841 | 1.75  |
| 289 | $z_{52}+2Pt-H_2O^{4+}$  | 1576.420604 | 1576.420580 | 0.02  |
| 290 | $z_{107}+2Pt^{8+}$      | 1577.826316 | 1577.824162 | 1.37  |
| 291 | $z_{65}+2Pt^{5+}$       | 1577.497207 | 1577.497340 | -0.08 |
| 292 | $z_{107}+2Pt^{8+}$      | 1577.826316 | 1577.824162 | 1.37  |
| 293 | $z_{52}+2Pt^{4+}$       | 1580.673981 | 1580.672982 | 0.63  |
| 294 | $c_{28}^{2+}$           | 1580.253960 | 1580.253861 | 0.06  |
| 295 | $c_{57}^{4+}$           | 1584.012975 | 1584.013645 | -0.42 |
| 296 | $\gamma^{4+}$           | 1584.000000 |             |       |
| 297 | $z_{53}+2Pt-H_2O^{4+}$  | 1590.425749 | 1590.425709 | 0.03  |
| 298 | $z_{74}+2Pt^{6+}$       | 1492.826775 | 1492.829246 | -1.66 |
| 299 | $z_{53}+2Pt^{4+}$       | 1594.929601 | 1594.928350 | 0.78  |
| 300 | $z_{66}+2Pt-H_2O^{5+}$  | 1599.703907 | 1599.703750 | 0.10  |
| 301 | $\gamma^{2+}$           | 1599.765710 |             |       |
| 302 | $z_{66}+2Pt^{5+}$       | 1603.307168 | 1603.305863 | 0.81  |
| 303 | $z_{95}+2Pt-H_2O^{7+}$  | 1607.142333 | 1607.140258 | 1.29  |
| 304 | $z_{95}+2Pt^{7+}$       | 1609.427300 | 1609.426807 | 0.31  |
| 305 | $\gamma^{2+}$           | 1609.000000 |             |       |
| 306 | $c_{58}^{4+}$           | 1612.772433 | 1612.770381 | 1.27  |
| 307 | $z_{54}+2Pt-H_2O^{4+}$  | 1619.185653 | 1619.182450 | 1.98  |
| 308 | $z_{54}+2Pt^{4+}$       | 1623.685857 | 1623.685091 | 0.47  |
| 309 | $c_{59}^{4+}$           | 1627.026720 | 1627.025747 | 0.60  |
| 310 | $z_{67}+2Pt^{5+}$       | 1629.116270 | 1629.114386 | 1.16  |
| 311 | $c_{29}^{2+}$           | 1630.778140 | 1630.777701 | 0.27  |
| 312 | $\gamma^{5+}$           | 1632.000000 |             |       |
| 313 | $\gamma^{5+}$           | 1643.121810 |             |       |
| 314 | $\gamma^{4+}$           | 1644.532710 |             |       |
| 315 | $c_{74}^{5+}$           | 1646.786809 | 1646.786838 | -0.02 |
| 316 | $z_{68}+2Pt^{5+}$       | 1646.522168 | 1646.520679 | 0.90  |
| 317 | $\gamma^{5+}$           | 1649.725560 |             |       |
| 318 | $z_{55}+2Pt-H_2O^{4+}$  | 1651.205504 | 1651.206199 | -0.42 |
| 319 | $z_{55}+2Pt^{4+}$       | 1655.710480 | 1655.708840 | 0.99  |
| 320 | $z_{69}+2Pt-H_2O^{5+}$  | 1665.921878 | 1665.923956 | -1.25 |
| 321 | $c_{45}^{3+}$           | 1668.149810 | 1668.149636 | 0.10  |
| 322 | $z_{69}+2Pt^{5+}$       | 1669.729148 | 1669.726362 | 1.67  |
| 323 | $\gamma^{2+}$           | 1672.819560 |             |       |
| 324 | $\gamma^{5+}$           | 1673.132130 |             |       |
| 325 | $\gamma^{3+}$           | 1677.156700 |             |       |

|     |                        |             |             |       |
|-----|------------------------|-------------|-------------|-------|
| 326 | $z_{56}+2Pt-H_2O^{4+}$ | 1680.967309 | 1680.970765 | -2.06 |
| 327 | $z_{56}+2Pt^{4+}$      | 1684.466917 | 1684.465581 | 0.79  |
| 328 | $z_{70}+2Pt^{5+}$      | 1689.743351 | 1689.735607 | 4.58  |
| 329 | $c_{14}$               | 1691.811880 | 1691.812272 | -0.23 |
| 330 | $c_{30}^{2+}$          | 1695.327219 | 1695.326888 | 0.20  |
| 331 | $z_{71}+2Pt-H_2O^{5+}$ | 1709.142049 | 1709.138885 | 1.85  |
| 332 | $z_{71}+2Pt^{5+}$      | 1712.941327 | 1712.941291 | 0.02  |
| 333 | $z_{57}+2Pt^{4+}$      | 1721.235009 | 1721.232639 | 1.38  |
| 334 | $z_{72}+2Pt-H_2O^{5+}$ | 1735.354705 | 1735.359285 | -2.64 |
| 335 | $z_{72}+2Pt^{5+}$      | 1738.157874 | 1738.159519 | -0.95 |
| 336 | $z_{58}+2Pt^{4+}$      | 1746.252348 | 1746.250034 | 1.33  |
| 337 | $c_{31}^{2+}$          | 1759.346870 | 1759.346479 | 0.22  |
| 338 | $c_{15}$               | 1762.849260 | 1762.849385 | -0.07 |
| 339 | $z_{73}+2Pt^{5+}$      | 1764.764988 | 1764.768385 | -1.92 |
| 340 | $z_{59}+2Pt^{4+}$      | 1785.277174 | 1785.275316 | 1.04  |
| 341 | $z_{74}+2Pt^{5+}$      | 1790.992326 | 1790.993349 | -0.57 |
| 342 | $z_{43}+2Pt^{3+}$      | 1801.081185 | 1801.079272 | 1.06  |
| 343 | $c_{32}^{2+}$          | 1815.892540 | 1815.888511 | 2.22  |
| 344 | $z_{60}+2Pt^{4+}$      | 1822.297847 | 1822.293192 | 2.55  |
| 345 | $z_{44}+2Pt^{3+}$      | 1838.776308 | 1838.776193 | 0.06  |
| 346 | $z_{61}+2Pt^{4+}$      | 1840.054836 | 1840.052473 | 1.28  |
| 347 | $c_{33}^{2+}$          | 1844.900046 | 1844.900949 | -0.49 |
| 348 | $?^{1+}$               | 1865.902360 |             |       |
| 349 | $z_{62}+2Pt^{4+}$      | 1872.065837 | 1872.062817 | 1.61  |
| 350 | $z_{45}+2Pt^{3+}$      | 1881.790292 | 1881.788727 | 0.83  |
| 351 | $c_{34}^{2+}$          | 1895.423669 | 1895.424788 | -0.59 |
| 352 | $z_{46}+2Pt^{3+}$      | 1905.802417 | 1905.803710 | -0.68 |
| 353 | $c_{16}$               | 1909.915852 | 1909.917799 | -1.02 |
| 354 | $z_{47}+2Pt^{3+}$      | 1929.147132 | 1929.146811 | 0.17  |
| 355 | $?^{3+}$               | 1934.153340 |             |       |
| 356 | $z_{48}+2Pt^{3+}$      | 1958.160290 | 1958.157491 | 1.43  |
| 357 | $z_{65}+2Pt^{4+}$      | 1972.125225 | 1972.120812 | 2.24  |
| 358 | $z_{49}+2Pt^{3+}$      | 1995.513694 | 1995.517982 | -2.15 |
| 359 | $c_{17}$               | 1996.948989 | 1996.949828 | -0.42 |
| 360 | $z_{66}+2Pt^{4+}$      | 2003.879279 | 2003.880510 | -0.61 |
| 361 | $c_{36}^{2+}$          | 2010.979895 | 2010.980881 | -0.49 |
| 362 | $z_{50}+2Pt^{3+}$      | 2050.203770 | 2050.206842 | -1.50 |
| 363 | $z_{51}+2Pt^{3+}$      | 2069.215140 | 2069.213900 | 0.60  |
| 364 | $z_{69}+2Pt-H_2O^{4+}$ | 2082.901128 | 2082.904951 | -1.84 |
| 365 | $z_{69}+2Pt^{4+}$      | 2087.408001 | 2087.407592 | 0.20  |
| 366 | $z_{52}+2Pt^{3+}$      | 2107.230315 | 2107.228217 | 1.00  |
| 367 | $z_{53}+2Pt^{3+}$      | 2127.241860 | 2127.244845 | -1.40 |
| 368 | $z_{54}+2Pt-H_2O^{3+}$ | 2158.906854 | 2158.907824 | -0.45 |
| 369 | $z_{54}+2Pt^{3+}$      | 2164.579285 | 2164.577696 | 0.73  |
| 370 | $z_{55}+2Pt-H_2O^{3+}$ | 2201.933232 | 2201.940444 | -3.28 |
| 371 | $z_{55}+2Pt^{3+}$      | 2207.274491 | 2207.276028 | -0.70 |
| 372 | $z_{56}+2Pt^{3+}$      | 2245.617465 | 2245.618350 | -0.39 |

|     |                               |             |             |       |
|-----|-------------------------------|-------------|-------------|-------|
| 373 | c <sub>19</sub>               | 2257.101740 | 2257.102306 | -0.25 |
| 374 | c <sub>41</sub> <sup>2+</sup> | 2281.633082 | 2281.629493 | 1.57  |
| 375 | c <sub>20</sub>               | 2372.129920 | 2372.129249 | 0.28  |
|     | Mean absolute deviation (ppm) |             |             | 0.59  |

Table S-3. ECD Fragments of the  $[\text{CaM}+5\text{Pt}(\text{dien})+10\text{H}]^{20+}$  ions

| No. | Assignments                                                  | Exp. mass<br>(Da) | Theo. mass<br>(Da) | Error<br>(ppm) |
|-----|--------------------------------------------------------------|-------------------|--------------------|----------------|
| 1   | $[\text{Pt}(\text{dien})-2\text{H}]^{+}$                     | 296.060078        | 296.060123         | -0.15          |
| 2   | $[\text{Pt}(\text{dien})]^{+}$                               | 298.075730        | 298.075773         | -0.14          |
| 3   | $[\text{Pt}(\text{dien})+\text{H}]^{+}$                      | 299.083250        | 299.083598         | -1.16          |
| 4   | $[\text{Pt}(\text{dien})(\text{CO})-\text{H}]^{+}$           | 325.062743        | 325.062325         | 1.29           |
| 5   | $[\text{Pt}(\text{dien})(\text{CH}_3\text{S})-\text{H}]^{+}$ | 344.063334        | 344.063506         | -0.50          |
| 6   | $\text{Pt}(\text{dien})(\text{CH}_3\text{S})^{+}$            | 345.071224        | 345.071331         | -0.03          |
| 7   | $\text{c}_3$                                                 | 374.167161        | 374.167025         | 0.36           |
| 8   | $\text{b}_4$                                                 | 470.224588        | 470.22454          | 0.10           |
| 9   | $\text{c}_4$                                                 | 487.251057        | 487.251089         | -0.07          |
| 10  | $\text{b}_5$                                                 | 571.272025        | 571.272218         | -0.34          |
| 11  | $\text{c}_5$                                                 | 588.298704        | 588.298767         | -0.11          |
| 12  | $\text{z}_{12}+2\text{Pt}(\text{dien})^{3+}$                 | 689.927521        | 689.927823         | -0.44          |
| 13  | $\text{b}_6$                                                 | 700.314677        | 700.314811         | -0.19          |
| 14  | $\text{z}_{20}+2\text{Pt}(\text{dien})^{4+}$                 | 717.530829        | 717.531519         | -0.96          |
| 15  | $\text{c}_6$                                                 | 717.341075        | 717.34136          | -0.40          |
| 16  | $\text{?}^{3+}$                                              | 727.286910        |                    |                |
| 17  | $\text{z}_{21}+2\text{Pt}(\text{dien})^{4+}$                 | 735.290662        | 735.290806         | -0.20          |
| 18  | $\text{z}_{48}+4\text{Pt}(\text{dien})^{9+}$                 | 741.206532        | 741.206553         | -0.03          |
| 19  | $\text{z}_{31}+3\text{Pt}(\text{dien})^{6+}$                 | 747.458561        | 747.459470         | -1.22          |
| 20  | $\text{z}_{14}+2\text{Pt}(\text{dien})^{3+}$                 | 765.636456        | 765.636859         | -0.53          |
| 21  | $\text{z}_{22}+2\text{Pt}(\text{dien})^{4+}$                 | 767.550330        | 767.551468         | -1.48          |
| 22  | $\text{z}_{57}+4\text{Pt}(\text{dien})^{10+}$                | 769.032138        | 769.031759         | 0.49           |
| 23  | $\text{z}_{51}+4\text{Pt}(\text{dien})^{9+}$                 | 779.225319        | 779.225741         | -0.54          |
| 24  | $\text{c}_{13}^{2+}$                                         | 781.888045        | 781.88847          | -0.55          |
| 25  | $\text{z}_{15}+2\text{Pt}(\text{dien})^{3+}$                 | 784.643353        | 784.644022         | -0.85          |
| 26  | $\text{z}_{65}+4\text{Pt}(\text{dien})^{11+}$                | 790.259691        | 790.261517         | -2.31          |
| 27  | $\text{z}_{52}+4\text{Pt}(\text{dien})^{9+}$                 | 791.897174        | 791.897178         | -0.01          |
| 28  | $\text{z}_{59}+4\text{Pt}(\text{dien})^{10+}$                | 794.548943        | 794.548718         | 0.28           |
| 29  | $\text{z}_{66}+4\text{Pt}(\text{dien})^{11+}$                | 801.990407        | 801.992662         | -2.81          |
| 30  | $\text{?}^{9+}$                                              | 808.900450        |                    |                |
| 31  | $\text{z}_{60}+4\text{Pt}(\text{dien})^{10+}$                | 809.355453        | 809.355804         | -0.43          |
| 32  | $\text{z}_{54}+4\text{Pt}(\text{dien})^{9+}$                 | 811.013047        | 811.013315         | -0.33          |
| 33  | $\text{z}_{46}+4\text{Pt}(\text{dien})^{8+}$                 | 815.097114        | 815.097816         | -0.86          |
| 34  | $\text{?}^{3+}$                                              | 816.314700        |                    |                |
| 35  | $\text{z}_{16}+2\text{Pt}(\text{dien})^{3+}$                 | 822.985996        | 822.986351         | -0.43          |
| 36  | $\text{z}_{55}+4\text{Pt}(\text{dien})^{9+}$                 | 825.357039        | 825.357484         | -0.54          |
| 37  | $\text{?}^{5+}$                                              | 825.328810        |                    |                |
| 38  | $\text{z}_{69}+4\text{Pt}(\text{dien})^{11+}$                | 832.091926        | 832.092520         | -0.71          |
| 39  | $\text{z}_{35}+3\text{Pt}(\text{dien})^{6+}$                 | 833.343887        | 833.346139         | -2.70          |
| 40  | $\text{z}_{48}+4\text{Pt}(\text{dien})^{8+}$                 | 834.856114        | 834.856462         | -0.42          |
| 41  | $\text{z}_{56}+4\text{Pt}(\text{dien})^{9+}$                 | 838.025275        | 838.026872         | -1.91          |
| 42  | $\text{z}_{17}+2\text{Pt}(\text{dien})^{3+}$                 | 841.992622        | 841.993513         | -1.06          |
| 43  | $\text{c}_7$                                                 | 846.383316        | 846.383953         | -0.75          |

|    |                                        |             |             |       |
|----|----------------------------------------|-------------|-------------|-------|
| 44 | $z_{29}+3Pt(dien)^{5+}$                | 848.135954  | 848.136442  | -0.58 |
| 45 | $z_{57}+4Pt(dien)^{9+}$                | 854.367353  | 854.3678131 | -0.54 |
| 46 | $z_{65}+4Pt(dien)^{10+}$               | 869.185226  | 869.186941  | -1.97 |
| 47 | $z_{30}+3Pt(dien)^{5+}$                | 873.943514  | 873.944980  | -1.68 |
| 48 | $z_{51}+4Pt(dien)^{8+}$                | 876.502434  | 876.503049  | -0.70 |
| 49 | $z_{18}+2Pt(dien)^{3+}$                | 880.335063  | 880.3358423 | -0.89 |
| 50 | $z_{66}+4Pt(dien)^{10+}$               | 882.090974  | 882.091200  | -0.26 |
| 51 | $c_{15}^{2+}$                          | 881.928653  | 881.928331  | 0.37  |
| 52 | $c_{23}^{3+}$                          | 891.429015  | 891.429057  | -0.05 |
| 53 | $z_{31}+3Pt(dien)^{5+}$                | 896.949295  | 896.950374  | -1.20 |
| 54 | $z_{68}+4Pt(dien)^{10+}$               | 903.597184  | 903.598053  | -0.96 |
| 55 | $[CaM+5Pt(dien)-H_2O+10H]^{20+}$       | 913.665494  | 913.665499  | -0.01 |
| 56 | $[CaM+5Pt(dien)+10H]^{20+}$            | 914.566326  | 914.566027  | 0.33  |
| 57 | $z_{19}+2Pt(dien)^{3+}$                | 918.030147  | 918.030603  | -0.50 |
| 58 | $z_{55}+4Pt(dien)^{8+}$                | 928.526216  | 928.526327  | -0.12 |
| 59 | $z_{65}+3Pt(dien)^{9+}$                | 932.64424   | 932.644262  | -0.02 |
| 60 | $z_{33}+3Pt(dien)^{5+}$                | 939.775017  | 939.776735  | -1.83 |
| 61 | $?^{5+}$                               | 942.579640  |             |       |
| 62 | $?^{9+}$                               | 946.761680  |             |       |
| 63 | $c_{25}^{3+}$                          | 948.777807  | 948.778526  | -0.76 |
| 64 | $z_{48}+4Pt(dien)^{7+}$                | 953.978085  | 953.977774  | 0.33  |
| 65 | $c_{16}^{2+}$                          | 955.461835  | 955.462538  | -0.74 |
| 66 | $z_{20}+2Pt(dien)^{3+}$                | 956.372235  | 956.372933  | -0.73 |
| 67 | $[CaM+5Pt(dien)-CH_3S-H_2O+10H]^{19+}$ | 959.278132  | 959.280302  | -2.26 |
| 68 | $[CaM+5Pt(dien)-CH_3S+10H]^{19+}$      | 960.226745  | 960.228227  | -1.54 |
| 69 | $[CaM+5Pt(dien)-H_2O+10H]^{19+}$       | 961.753196  | 961.753735  | -0.56 |
| 70 | $[CaM+5Pt(dien)+10H]^{19+}$            | 962.700602  | 962.701660  | -1.10 |
| 71 | $z_{65}+4Pt(dien)^{9+}$                | 965.539523  | 965.539553  | -0.03 |
| 72 | $?^{9+}$                               | 970.988670  |             |       |
| 73 | $z_{58}+4Pt(dien)^{8+}$                | 973.545398  | 973.546739  | -1.38 |
| 74 | $?^{7+}$                               | 975.140160  |             |       |
| 75 | $z_{11}+2Pt(dien)^{2+}$                | 976.866016  | 976.865640  | 0.38  |
| 76 | $z_{21}+2Pt(dien)^{3+}$                | 980.052277  | 980.051983  | 0.30  |
| 77 | $c_{26}^{3+}$                          | 982.460682  | 982.461086  | -0.41 |
| 78 | $c_{17}^{2+}$                          | 998.978327  | 998.978552  | -0.23 |
| 79 | $[CaM+4Pt(dien)-CH_3S-H_2O+10H]^{18+}$ | 995.958021  | 995.957715  | 0.31  |
| 80 | $[CaM+4Pt(dien)-CH_3S+10H]^{18+}$      | 996.958369  | 996.958303  | 0.07  |
| 81 | $[CaM+4Pt(dien)-H_2O+10H]^{18+}$       | 998.624525  | 998.624222  | 0.30  |
| 82 | $[CaM+4Pt(dien)+10H]^{18+}$            | 999.624754  | 999.624809  | -0.06 |
| 83 | $[CaM+5Pt(dien)-CH_3S-H_2O+10H]^{18+}$ | 1012.517103 | 1012.517504 | -0.40 |
| 84 | $[CaM+5Pt(dien)-CH_3S+10H]^{18+}$      | 1013.571719 | 1013.573751 | -2.00 |
| 85 | $[CaM+5Pt(dien)-H_2O+10H]^{18+}$       | 1015.182782 | 1015.184009 | -1.21 |
| 86 | $[CaM+5Pt(dien)+10H]^{18+}$            | 1016.183387 | 1016.184596 | -1.19 |
| 87 | $[CaM+4Pt(dien)-CH_3S-H_2O+10H]^{17+}$ | 1054.601115 | 1054.602528 | -1.34 |
| 88 | $[CaM+4Pt(dien)-CH_3S+10H]^{17+}$      | 1055.602001 | 1055.603038 | -0.98 |
| 89 | $[CaM+4Pt(dien)-H_2O+10H]^{17+}$       | 1057.365952 | 1057.366953 | -0.95 |
| 90 | $[CaM+4Pt(dien)+10H]^{17+}$            | 1058.425060 | 1058.426398 | -1.26 |

|     |                                           |             |             |       |
|-----|-------------------------------------------|-------------|-------------|-------|
| 91  | $c_{117}+2Pt(dien)^{13+}$                 | 1061.812279 | 1061.812756 | -0.45 |
| 92  | $c_{38}^{4+}$                             | 1066.526508 | 1066.526542 | -0.03 |
| 93  | $b_9$                                     | 1070.499605 | 1070.500046 | -0.41 |
| 94  | $[CaM+5Pt(dien)-CH_3S-H_2O+10H]^{17+...}$ | 1072.135116 | 1072.136355 | -1.16 |
| 95  | $[CaM+5Pt(dien)-CH_3S+10H]^{17+...}$      | 1073.192642 | 1073.195801 | -2.94 |
| 96  | $[CaM+5Pt(dien)-H_2O+10H]^{17+...}$       | 1074.959298 | 1074.959711 | -0.38 |
| 97  | $c_{93}+Pt(dien)^{10+}$                   | 1086.310822 | 1086.311212 | -0.36 |
| 98  | $c_{49}^{5+}$                             | 1089.536692 | 1089.537162 | -0.43 |
| 99  | $z_{30}+3Pt(dien)^{4+}$                   | 1092.179897 | 1092.179818 | 0.07  |
| 100 | $c_{94}+Pt(dien)^{10+}$                   | 1099.119676 | 1099.120709 | -0.94 |
| 101 | $c_{40}^{4+}$                             | 1108.802188 | 1108.802070 | 0.11  |
| 102 | $c_{86}+Pt(dien)^{9+}$                    | 1110.852945 | 1110.854621 | -1.51 |
| 103 | $c_{77}+Pt(dien)^{8+}$                    | 1115.153248 | 1115.154333 | -0.97 |
| 104 | $c_{96}+Pt(dien)^{10+}$                   | 1116.324985 | 1116.325551 | -0.51 |
| 105 | $[CaM+4Pt(dien)-CH_3S-H_2O+10H]^{16+...}$ | 1120.513669 | 1120.515187 | -1.35 |
| 106 | $[CaM+4Pt(dien)-CH_3S+10H]^{16+...}$      | 1121.575870 | 1121.578228 | -2.10 |
| 107 | $[CaM+4Pt(dien)-H_2O+10H]^{16+...}$       | 1123.389994 | 1123.389771 | 0.20  |
| 108 | $[CaM+4Pt(dien)+10H]^{16+...}$            | 1124.515018 | 1124.515431 | -0.37 |
| 109 | $c_{97}+Pt(dien)^{10+}$                   | 1127.727591 | 1127.729845 | -2.00 |
| 110 | $c_{19}^{2+}$                             | 1129.053648 | 1129.054791 | -1.01 |
| 111 | $c_{78}+Pt(dien)^{8+}$                    | 1129.408078 | 1129.407317 | 0.67  |
| 112 | $c_{30}^{3+}$                             | 1130.218559 | 1130.219214 | -0.58 |
| 113 | $c_{41}^{4+}$                             | 1140.816085 | 1140.816715 | -0.55 |
| 114 | $c_{79}+Pt(dien)^{8+}$                    | 1142.161889 | 1142.163663 | -1.55 |
| 115 | $c_{80}+Pt(dien)^{8+}$                    | 1156.540502 | 1156.542032 | -1.32 |
| 116 | $c_{10}$                                  | 1158.563786 | 1158.563708 | 0.07  |
| 117 | $c_{100}+Pt(dien)^{10+}$                  | 1161.046132 | 1161.046734 | -0.52 |
| 118 | $c_{81}+Pt(dien)^{8+}$                    | 1167.420970 | 1167.421036 | -0.06 |
| 119 | $c_{101}+Pt(dien)^{10+}$                  | 1169.747148 | 1169.749938 | -2.39 |
| 120 | $c_{31}^{3+}$                             | 1173.233902 | 1173.233411 | 0.42  |
| 121 | $c_{82}+Pt(dien)^{8+}$                    | 1183.550084 | 1183.551362 | -1.08 |
| 122 | $c_{53}^{5+}$                             | 1184.176463 | 1184.176056 | 0.34  |
| 123 | $c_{20}^{2+}$                             | 1186.568598 | 1186.568263 | 0.28  |
| 124 | $[CaM+4Pt(dien)-CH_3S-H_2O+10H]^{15+...}$ | 1195.214402 | 1195.216345 | -1.63 |
| 125 | $[CaM+4Pt(dien)-CH_3S+10H]^{15+...}$      | 1196.415953 | 1196.417050 | -0.92 |
| 126 | $c_{83}+Pt(dien)^{8+}$                    | 1199.680959 | 1199.681688 | -0.61 |
| 127 | $c_{93}+Pt(dien)^{9+}$                    | 1206.899263 | 1206.900538 | -1.06 |
| 128 | $c_{32}^{3+}$                             | 1210.927075 | 1210.928099 | -0.85 |
| 129 | $c_{44}^{4+}$                             | 1218.851827 | 1218.852557 | -0.60 |
| 130 | $c_{94}+Pt(dien)^{9+}$                    | 1221.132951 | 1221.133313 | -0.30 |
| 131 | $c_{85}+Pt(dien)^{8+}$                    | 1230.073049 | 1230.072898 | 0.12  |
| 132 | $c_{33}^{3+}$                             | 1229.934715 | 1229.935254 | -0.44 |
| 133 | $c_{96}+Pt(dien)^{9+}$                    | 1240.24939  | 1240.249804 | -0.33 |
| 134 | $c_{86}+Pt(dien)^{8+}$                    | 1249.459456 | 1249.460165 | -0.57 |
| 135 | $c_{21}^{2+}$                             | 1250.615729 | 1250.615744 | -0.01 |
| 136 | $c_{45}^{4+}$                             | 1251.865782 | 1251.865714 | 0.05  |
| 137 | $c_{56}^{4+}$                             | 1253.204701 | 1253.204948 | -0.20 |

|     |                                       |             |             |       |  |
|-----|---------------------------------------|-------------|-------------|-------|--|
| 138 | $\eta^{16+}$                          | 1255.796560 |             |       |  |
| 139 | $\eta^{4+}$                           | 1257.869450 |             |       |  |
| 140 | $c_{34}^{3+}$                         | 1263.617647 | 1263.617813 | -0.13 |  |
| 141 | $c_{87}+\text{Pt}(\text{dien})^{8+}$  | 1265.590347 | 1265.590490 | -0.11 |  |
| 142 | $\eta^{5+}$                           | 1267.211670 |             |       |  |
| 143 | $c_{46}^{4+}$                         | 1268.871561 | 1268.872484 | -0.73 |  |
| 144 | $c_{77}+\text{Pt}(\text{dien})^{7+}$  | 1274.173891 | 1274.174901 | -0.79 |  |
| 145 | $\eta^{9+}$                           | 1284.938490 |             |       |  |
| 146 | $c_{11}$                              | 1287.601493 | 1287.606302 | -3.73 |  |
| 147 | $c_{100}+\text{Pt}(\text{dien})^{9+}$ | 1289.940532 | 1289.940007 | 0.41  |  |
| 148 | $c_{55}+\text{Pt}(\text{dien})^{5+}$  | 1290.015016 | 1290.012598 | 1.87  |  |
| 149 | $c_{89}+\text{Pt}(\text{dien})^{8+}$  | 1292.853160 | 1292.853686 | -0.41 |  |
| 150 | $c_{35}^{3+}$                         | 1296.640610 | 1296.640618 | -0.01 |  |
| 151 | $\eta^{7+}$                           | 1298.468630 |             |       |  |
| 152 | $c_{47}^{4+}$                         | 1301.133767 | 1301.133132 | 0.49  |  |
| 153 | $c_{59}^{5+}$                         | 1301.419784 | 1301.42075  | -0.74 |  |
| 154 | $c_{79}+\text{Pt}(\text{dien})^{7+}$  | 1305.184872 | 1305.186004 | -0.87 |  |
| 155 | $c_{22}^{2+}$                         | 1308.128919 | 1308.129216 | -0.23 |  |
| 156 | $c_{90}+\text{Pt}(\text{dien})^{8+}$  | 1312.618001 | 1312.61709  | 0.69  |  |
| 157 | $\eta^{7+}$                           | 1314.899920 |             |       |  |
| 158 | $c_{80}+\text{Pt}(\text{dien})^{7+}$  | 1321.618669 | 1321.618426 | 0.18  |  |
| 159 | $c_{81}+\text{Pt}(\text{dien})^{7+}$  | 1334.051096 | 1334.051574 | -0.36 |  |
| 160 | $c_{23}^{2+}$                         | 1336.639751 | 1336.639947 | -0.15 |  |
| 161 | $c_{36}^{3+}$                         | 1340.319966 | 1340.320779 | -0.61 |  |
| 162 | $c_{92}+\text{Pt}(\text{dien})^{8+}$  | 1343.258450 | 1343.258826 | -0.28 |  |
| 163 | $\eta^{7+}$                           | 1345.910930 |             |       |  |
| 164 | $c_{82}+\text{Pt}(\text{dien})^{7+}$  | 1352.486454 | 1352.486231 | 0.16  |  |
| 165 | $c_{49}^{4+}$                         | 1361.669998 | 1361.669633 | 0.27  |  |
| 166 | $\eta^{7+}$                           | 1364.348310 |             |       |  |
| 167 | $c_{83}+\text{Pt}(\text{dien})^{7+}$  | 1370.920160 | 1370.920890 | -0.53 |  |
| 168 | $c_{94}+\text{Pt}(\text{dien})^{8+}$  | 1373.647589 | 1373.649068 | -1.08 |  |
| 169 | $c_{63}^{5+}$                         | 1378.456444 | 1378.459977 | -2.56 |  |
| 170 | $\eta^{7+}$                           | 1382.925310 |             |       |  |
| 171 | $c_{50}^{4+}$                         | 1390.677257 | 1390.677203 | 0.04  |  |
| 172 | $c_{37}^{3+}$                         | 1392.353599 | 1392.354483 | -0.63 |  |
| 173 | $c_{24}^{2+}$                         | 1394.153161 | 1394.153419 | -0.19 |  |
| 174 | $c_{96}+\text{Pt}(\text{dien})^{8+}$  | 1394.281455 | 1394.280491 | 0.69  |  |
| 175 | $\eta^{2+}$                           | 1401.159230 |             |       |  |
| 176 | $c_{64}^{5+}$                         | 1401.867273 | 1401.866672 | 0.43  |  |
| 177 | $c_{85}+\text{Pt}(\text{dien})^{7+}$  | 1405.509923 | 1405.510416 | -0.35 |  |
| 178 | $c_{25}-\text{H}_2\text{O}^{2+}$      | 1414.160925 | 1414.160574 | 0.25  |  |
| 179 | $\eta^{1+}$                           | 1417.646743 |             |       |  |
| 180 | $c_{38}^{3+}$                         | 1421.698617 | 1421.699630 | -0.71 |  |
| 181 | $c_{25}^{2+}$                         | 1422.663974 | 1422.664151 | -0.12 |  |
| 182 | $c_{86}+\text{Pt}(\text{dien})^{7+}$  | 1427.667162 | 1427.667273 | -0.08 |  |
| 183 | $\eta^{12+}$                          | 1442.175260 |             |       |  |
| 184 | $c_{87}+\text{Pt}(\text{dien})^{7+}$  | 1446.244955 | 1446.245235 | -0.19 |  |

|     |                                         |             |             |       |
|-----|-----------------------------------------|-------------|-------------|-------|
| 185 | c <sub>52</sub> <sup>4+</sup>           | 1451.456024 | 1451.457506 | -1.02 |
| 186 | c <sub>39</sub> <sup>3+</sup>           | 1459.395113 | 1459.394030 | 0.74  |
| 187 | ? <sup>3+</sup>                         | 1471.608450 |             |       |
| 188 | c <sub>26</sub> <sup>2+</sup>           | 1473.187500 | 1473.187990 | -0.33 |
| 189 | c <sub>89</sub> +Pt(dien) <sup>7+</sup> | 1477.549534 | 1477.546458 | 2.08  |
| 190 | c <sub>40</sub> <sup>3+</sup>           | 1478.401710 | 1478.401457 | 0.17  |
| 191 | c <sub>53</sub> <sup>4+</sup>           | 1479.967559 | 1479.968251 | -0.47 |
| 192 | ? <sup>3+</sup>                         | 1493.915950 |             |       |
| 193 | ? <sup>3+</sup>                         | 1506.415980 |             |       |
| 194 | ? <sup>2+</sup>                         | 1507.705720 |             |       |
| 195 | c <sub>41</sub> <sup>3+</sup>           | 1520.753519 | 1520.753194 | 0.21  |
| 196 | c <sub>27</sub> <sup>2+</sup>           | 1529.730215 | 1529.730022 | 0.13  |
| 197 | c <sub>92</sub> +Pt(dien) <sup>7+</sup> | 1534.05336  |             |       |
| 198 | c <sub>55</sub> <sup>4+</sup>           | 1536.996711 | 1536.996003 | 0.46  |
| 199 | ? <sup>2+</sup>                         | 1549.242880 |             |       |
| 200 | c <sub>13</sub>                         | 1562.770080 | 1562.769676 | 0.26  |
| 201 | c <sub>56</sub> <sup>4+</sup>           | 1566.253023 | 1566.254366 | -0.85 |
| 202 | ? <sup>6+</sup>                         | 1570.072130 |             |       |
| 203 | c <sub>82</sub> +Pt(dien) <sup>6+</sup> | 1577.565060 | 1577.565535 | -0.30 |
| 204 | c <sub>28</sub> <sup>2+</sup>           | 1580.253955 | 1580.253861 | 0.06  |
| 205 | c <sub>57</sub> <sup>4+</sup>           | 1583.510552 | 1583.512017 | -0.93 |
| 206 | ? <sup>6+</sup>                         | 1591.735880 |             |       |
| 207 | c <sub>83</sub> +Pt(dien) <sup>6+</sup> | 1598.238236 | 1598.239825 | -0.99 |
| 208 | ? <sup>2+</sup>                         | 1599.765740 |             |       |
| 209 | ? <sup>2+</sup>                         | 1608.769190 |             |       |
| 210 | c <sub>58</sub> <sup>4+</sup>           | 1612.266469 | 1612.268753 | -1.42 |
| 211 | c <sub>44</sub> <sup>3+</sup>           | 1625.135842 | 1625.135439 | 0.25  |
| 212 | c <sub>59</sub> <sup>4+</sup>           | 1626.776576 | 1626.774944 | 1.00  |
| 212 | c <sub>29</sub> <sup>2+</sup>           | 1630.778168 | 1630.777701 | 0.29  |
| 213 | c <sub>45</sub> <sup>3+</sup>           | 1668.150143 | 1668.149636 | 0.30  |
| 214 | c <sub>61</sub> <sup>4+</sup>           | 1669.793779 | 1669.791846 | 1.16  |
| 215 | ? <sup>2+</sup>                         | 1672.818790 |             |       |
| 216 | ? <sup>3+</sup>                         | 1677.161210 |             |       |
| 217 | c <sub>14</sub>                         | 1691.812455 | 1691.812272 | 0.11  |
| 218 | c <sub>30</sub> <sup>2+</sup>           | 1694.825403 | 1694.825182 | 0.13  |
| 219 | c <sub>31</sub> <sup>2+</sup>           | 1759.347762 | 1759.346479 | 0.73  |
| 220 | c <sub>15</sub>                         | 1762.850828 | 1762.849385 | 0.82  |
| 221 | c <sub>32</sub> <sup>2+</sup>           | 1815.893164 | 1815.888511 | 2.56  |
| 222 | c <sub>33</sub> <sup>2+</sup>           | 1844.397857 | 1844.399242 | -0.75 |
| 223 | ? <sup>1+</sup>                         | 1865.904520 |             |       |
| 224 | ? <sup>2+</sup>                         | 1873.420190 |             |       |
| 225 | c <sub>34</sub> <sup>2+</sup>           | 1894.924541 | 1894.923082 | 0.77  |
| 226 | c <sub>16</sub>                         | 1909.918207 | 1909.917780 | 0.22  |
| 227 | c <sub>17</sub>                         | 1996.950698 | 1996.949828 | 0.44  |
| 228 | ? <sup>2+</sup>                         | 2010.477840 |             |       |
| 229 | c <sub>18</sub>                         | 2110.036609 | 2110.033892 | 1.29  |
| 230 | c <sub>19</sub>                         | 2257.105508 | 2257.102306 | 1.42  |



|     |                               |             |             |       |
|-----|-------------------------------|-------------|-------------|-------|
| 231 | $\gamma^{1+}$                 | 2281.622640 |             |       |
| 232 | $c_{20}$                      | 2372.127611 | 2372.129249 | -0.69 |
| 233 | $c_{21}$                      | 2500.226977 | 2500.224212 | 1.11  |
|     | Mean absolute deviation (ppm) |             |             | 0.60  |
|     | Standard deviation (ppm)      |             |             | 0.88  |

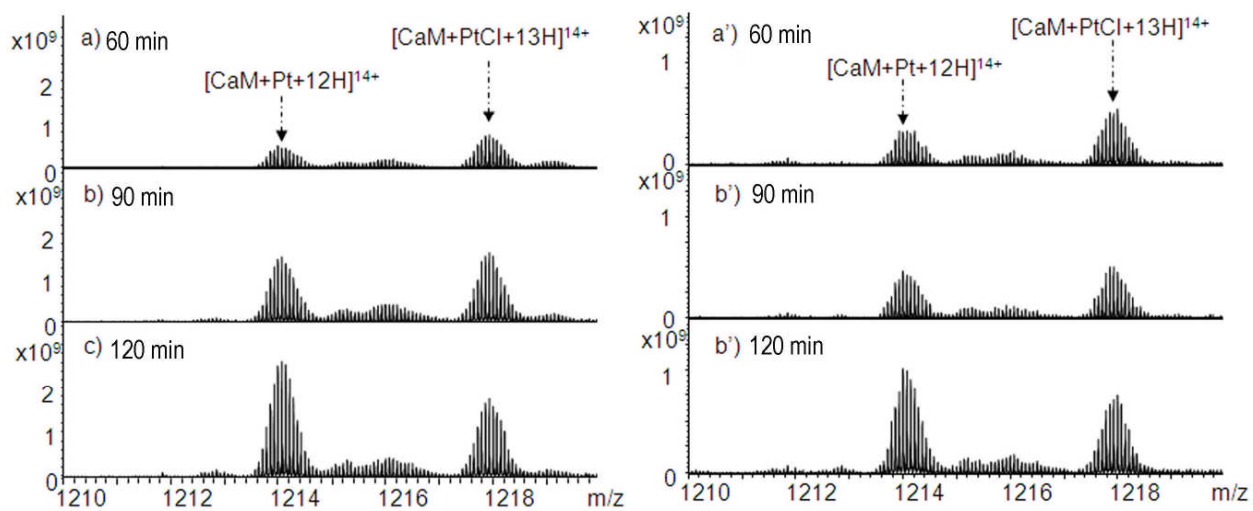

Figure S-1. ESI-FTMS analyses of anti-cancer platinum drug-CaM mixtures after different reaction times. CaM:Pt<sub>1</sub> (1:2) at (a) 60min, (b) 90min, and (c) 120min; CaM:Pt<sub>3</sub> (1:1) at (a') 60min, (b') 90min, and (c') 120min.

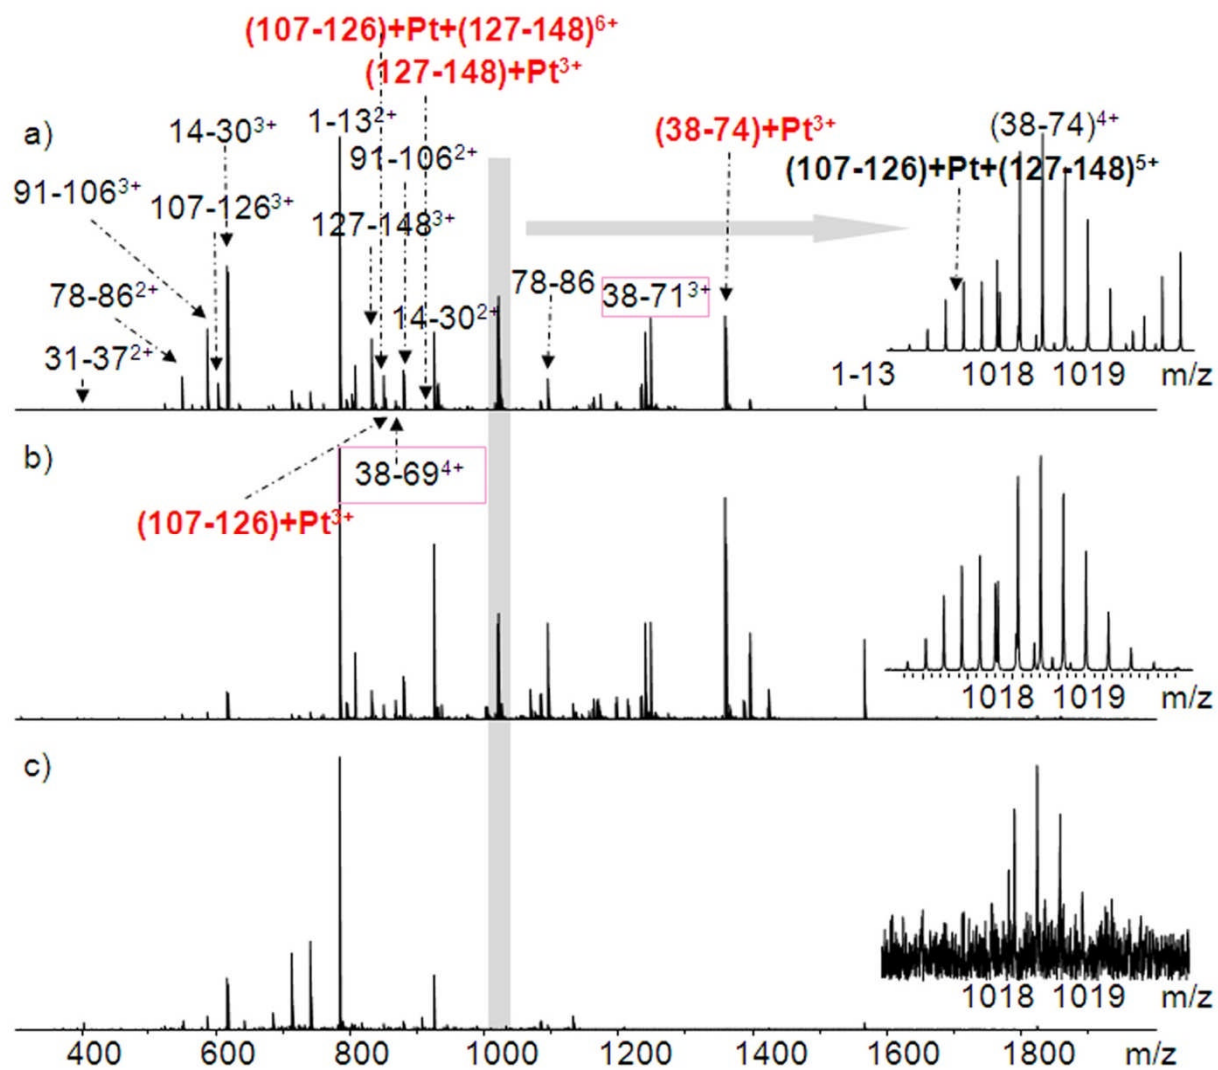

Figure S-2. ESI-FTMS analyses of trypsin-digested CaM-cisplatin (Pt<sub>1</sub>) samples at different molar ratios. (a) CaM:Pt<sub>1</sub> (1:1); (b) CaM:Pt<sub>1</sub> (1:2); (c) CaM:Pt<sub>1</sub> (1:8).

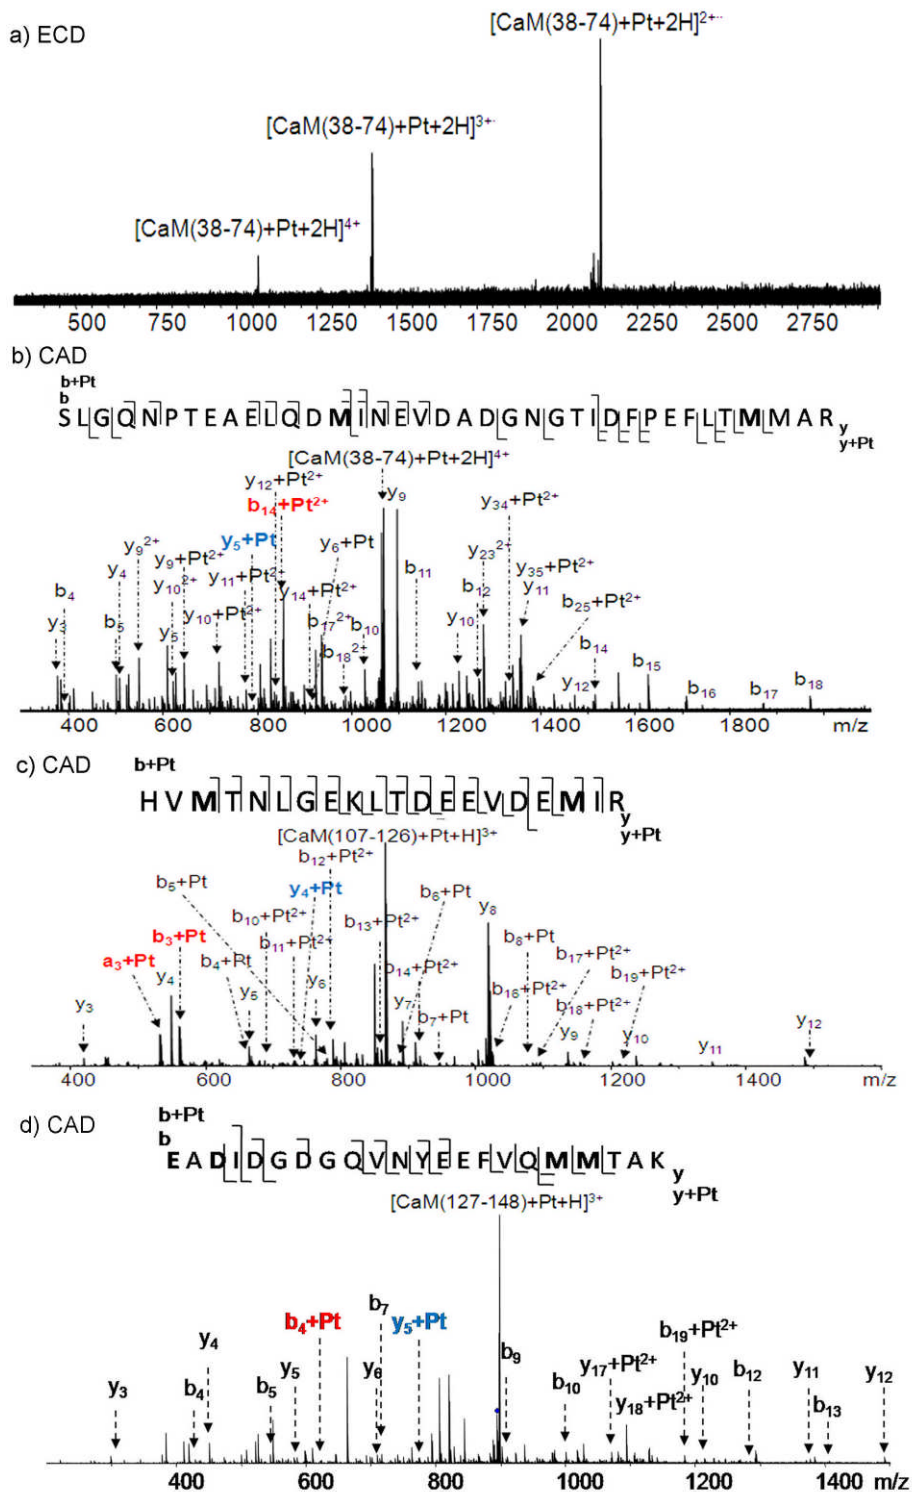

**Figure S-3.** Bottom-up MS/MS spectra of CaM:cisplatin (1:2). (a) ECD spectrum of  $[\text{CaM}(38-74)+\text{Pt}+2\text{H}]^{4+}$  ion at  $m/z$  1066; (b) CAD spectrum of  $[\text{CaM}(38-74)+\text{Pt}+2\text{H}]^{4+}$  ion at  $m/z$  1066; the observation of  $b_{14}+\text{Pt}^{2+}$  and  $y_5+\text{Pt}$  ions suggests that Pt cross-links Met51 and Met71 or Met72. (c) CAD spectrum of  $[\text{CaM}(107-126)+\text{Pt}+\text{H}]^{3+}$  ion at  $m/z$  865; the observation of  $b_3+\text{Pt}$  and  $y_4+\text{Pt}$  suggests that Pt cross-links Met109 and Met124 (d) CAD spectrum of

[CaM(127-148)+Pt+H]<sup>3+</sup> ion at  $m/z$  895. The detection of b<sub>4</sub>+Pt and y<sub>5</sub>+Pt ions suggests that Pt cross-links E127 or D129 with Met144 and Met145.

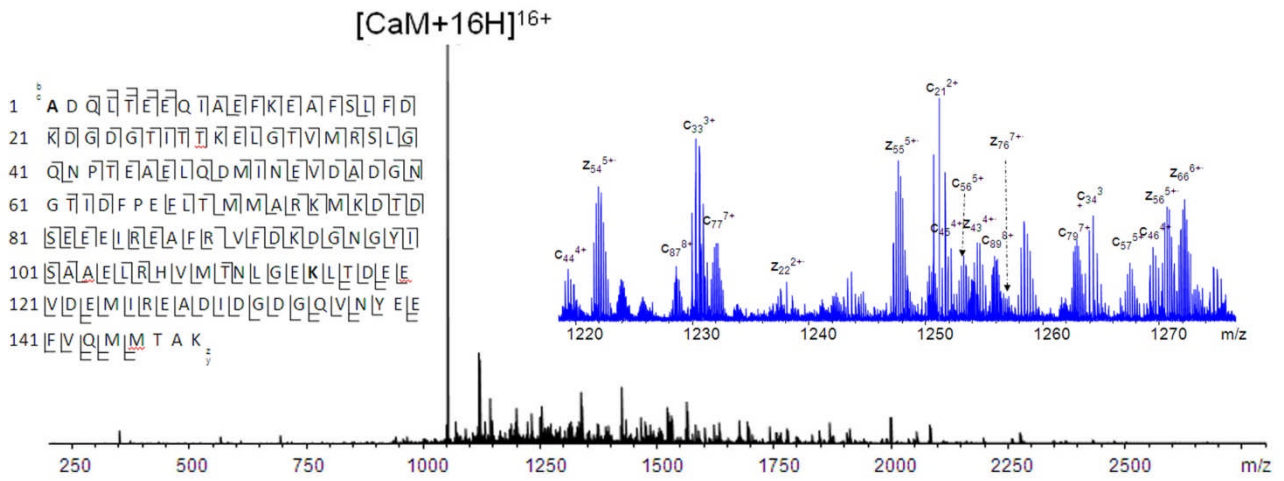

**Figure S-4.** ECD spectra of  $[\text{CaM}+16\text{H}]^{16+}$  ions at  $m/z$  1050 in a CaM sample. The insert is shown to compare with Figure 2b, which indicates that the intra-chain cross-linking of Pt between CaM(109) and CaM(144) contributes to repressed detections of cleavages in the region of CaM(106-148) in the top-down analyses. 91% backbone cleavage efficiency was achieved.

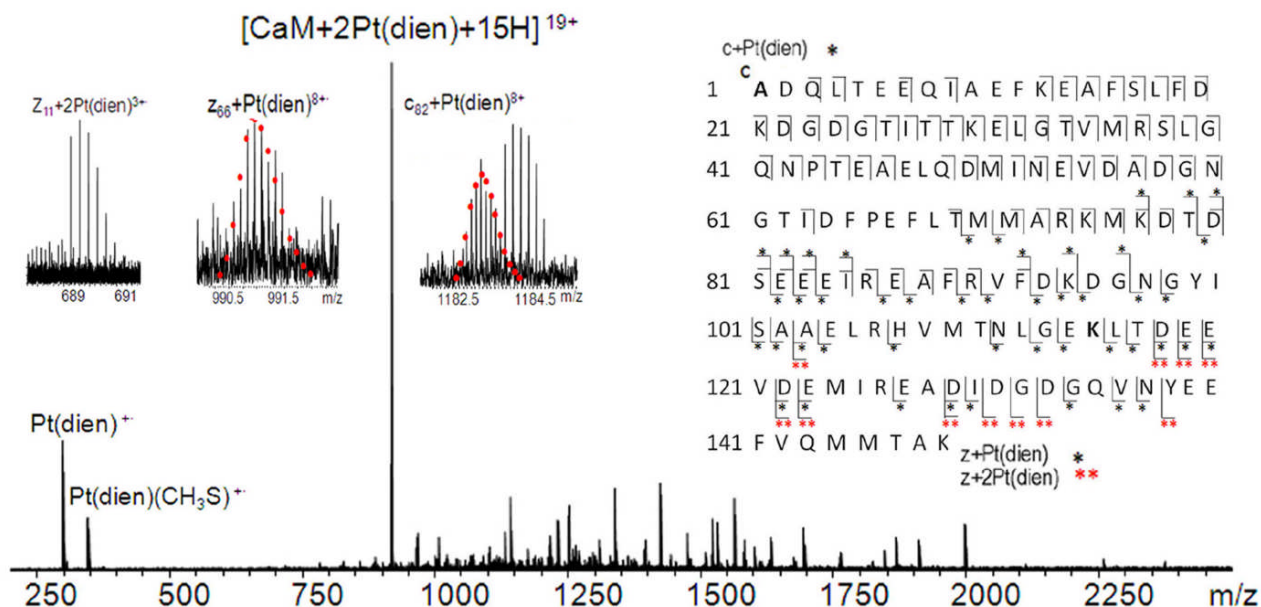

**Figure S-5.** ECD spectrum of  $[\text{CaM}+2\text{Pt}(\text{dien})+15\text{H}]^{19+}$  ions at  $m/z$  916 in the sample of CaM: cisplatin (1:2). The left inserts are the complimentary  $c/z^*$  ion pair,  $c_{82}+\text{Pt}(\text{dien})^{8+}$  and  $z_{66}+\text{Pt}(\text{dien})^{8+}$ ; the right insert is the fragmentation map of the ECD spectrum of CaM+2Pt(dien). Single dot represent singly Pt(dien)-modified fragments; two dots represent doubly Pt(dien)-modified fragments.





[CaM(107-126)+2Pt(dien)+H]<sup>5+</sup> ion at  $m/z$  600; (c) CAD spectrum of [CaM(127-148)+Pt(dien)+2H]<sup>4+</sup> ion at  $m/z$  697. Single stars represent singly Pt(dien)-modified fragments; double stars represent doubly Pt(dien)-modified fragments.
